# Supplementary material for: Chemogenetic attenuation of neuronal activity in the entorhinal cortex reduces Aβ and tau pathology in the hippocampus
Source: PubMed Central journal article supplement (PMC7467290; doi:10.1371/journal.pbio.3000851), 2020-08-21

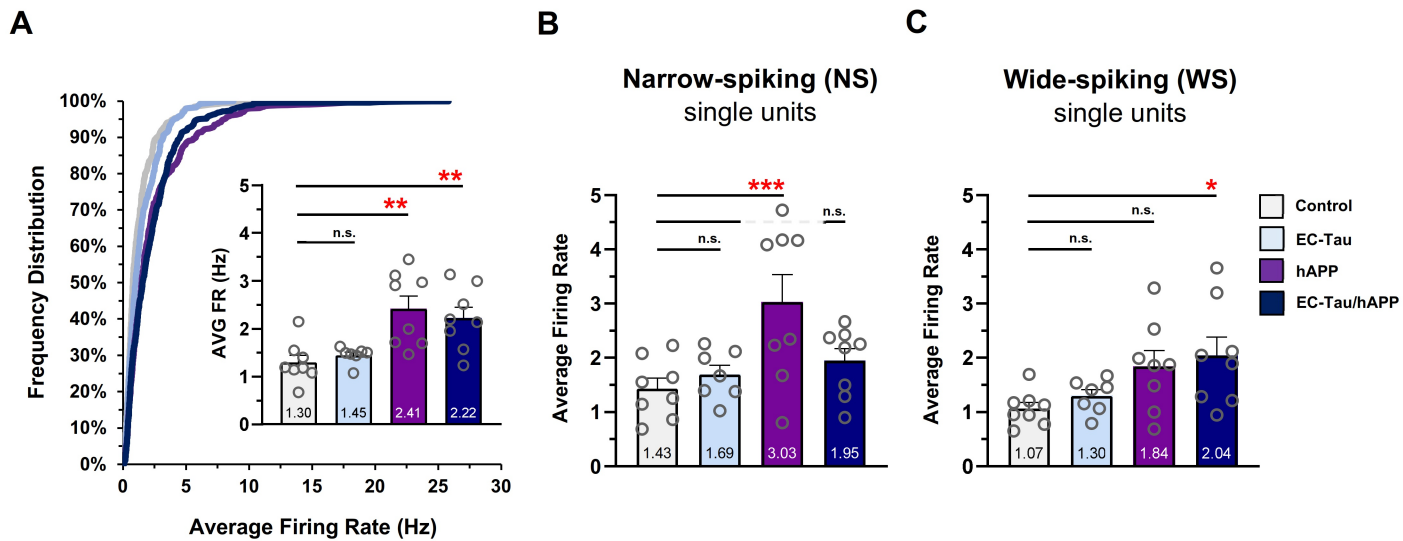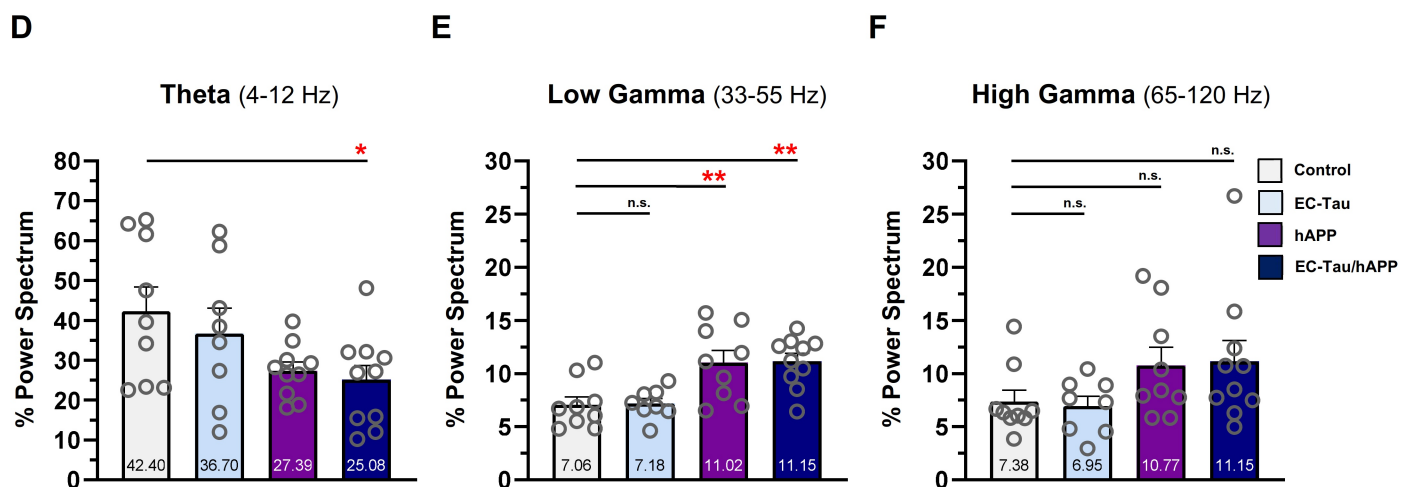

Supplement: pbio.3000851.s002.pdf [file pbio.3000851.s002.pdf]
